# Supplementary material for: Enhanced hydrogen evolution reaction activity of hydrogen-annealed vertical MoS2 nanosheets
Source: Royal Society of Chemistry journal article supplement (doi:10.1039/c8ra01147h), 2018-01-01
Supplement: c8ra01147h1.pdf [file c8ra01147h1.pdf]

## **Enhanced Hydrogen Evolution Reaction Activity of Hydrogen- Annealed Vertical MoS<sub>2</sub> Nanosheets**

Mengci He,<sup>a</sup> Fanpeng Kong,<sup>b</sup> Geping Yin,<sup>b</sup> Zhe Lv,<sup>c</sup> Xiudong Sun,<sup>a,d</sup> Hongyan  
Shi,<sup>a,d\*</sup> Bo Gao<sup>a,d\*</sup>

<sup>a</sup> Institute of Modern Optics, Key Lab of Micro-optics and Photonic Technology of Heilongjiang Province, Key Laboratory of Micro-Nano Optoelectronic Information System, Ministry of Industry and Information Technology, Department of Physics, Harbin Institute of Technology, Harbin 150001, China.

<sup>b</sup> School of Chemistry and Chemical Engineering, Harbin Institute of Technology, Harbin 150001, China.

<sup>c</sup> Department of Physics, Harbin Institute of Technology, Harbin 150080, China

<sup>d</sup> Collaborative Innovation Center of Extreme Optics, Shanxi University, Taiyuan 03006, China.

### **Corresponding Author:**

Prof. Bo Gao

Email: gaobo@hit.edu.cn

Phone: 86-18204505038

Prof. Hongyan Shi

Email: shi.hong.yan@hit.edu.cn

Phone: 86-18646083576

## Supplementary Figures

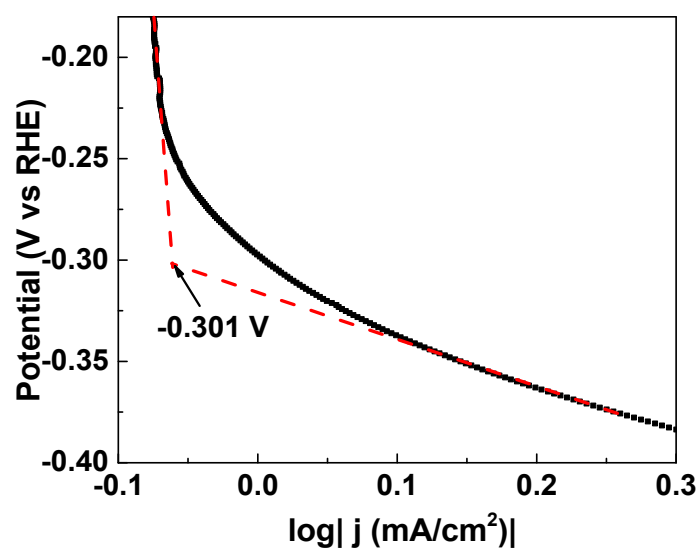

**Figure S1.** Calculation of onset overpotential using the Tafel plot of the MoS<sub>2</sub> sample in the region of low current densities.

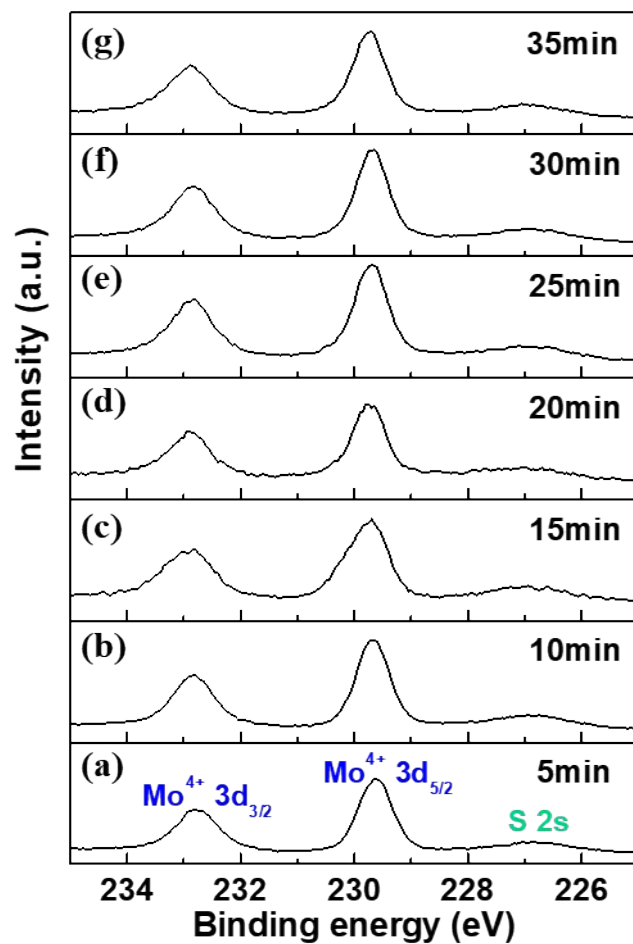

**Figure S2.** XPS data of Mo 3d region for the re-sulfurized MoS<sub>2</sub> nanosheets for the annealing time of (a) 5, (b) 10, (c) 15, (d) 20, (e) 25, (f) 30 and (g) 35 min, respectively.

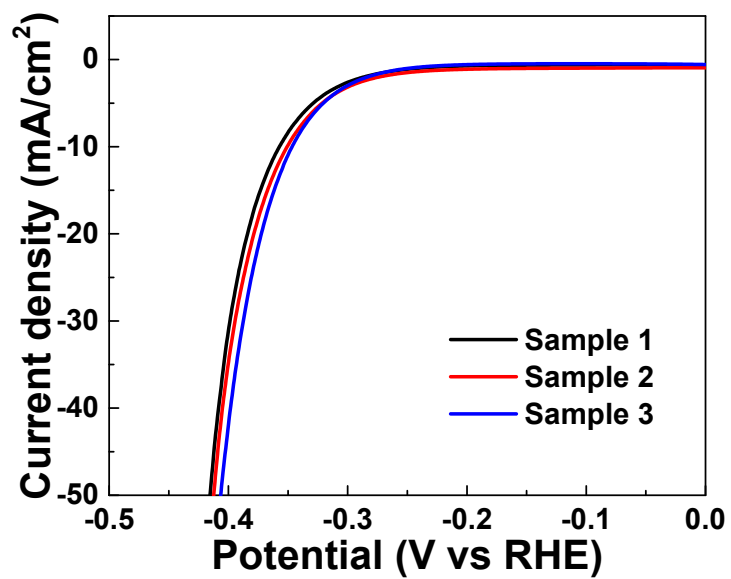

**Figure S3.** Cathodic polarization curves of three H<sub>2</sub>-annealed MoS<sub>2</sub> samples.

Annealing time: 20 min.
